# Supplementary material
Source: PubMed Central journal article supplement (PMC6239424)
Supplement: NIHMS43358-supplement-01.pdf [file NIHMS43358-supplement-01.pdf]

Supplemental Data

**A La-Related Protein Modulates 7SK  
snRNP Integrity to Suppress P-TEFb-Dependent  
Transcriptional Elongation and Tumorigenesis**

Nanhai He, Nadine S. Jahchan, Eunmee Hong, Qiang Li, Mark A. Bayfield, Richard J. Maraia,  
Kunxin Luo, and Qiang Zhou

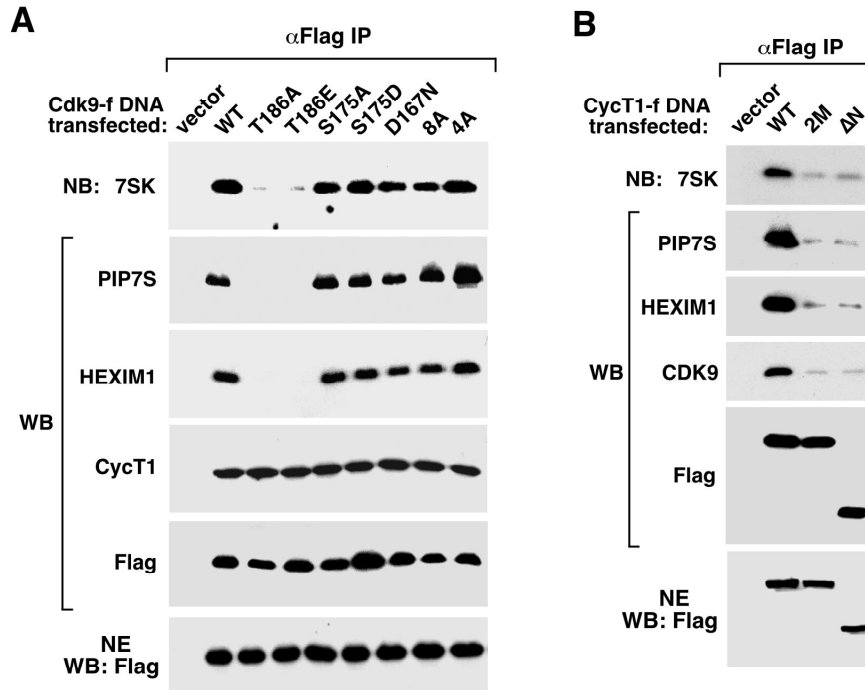

**Figure S1. Both the Cdk9 T-loop and CycT1 cyclin-box are required for the interaction of PIP7S with P-TEFb.** A. Mutation of the Cdk9 T-loop disrupts the 7SK-P-TEFb binding, which in turn dissociates PIP7S and HEXIM1 from P-TEFb. Anti-Flag IP derived from NEs (bottom panel) of HeLa cells transfected with the indicated wild-type or mutant Cdk9-f constructs were analyzed by western (WB) and northern blotting (NB). The Cdk9 mutants T186A and T186E,

which contain substitutions at the tip of the T-loop, are unable to interact with 7SK and HEXIM1 (Chen et al., 2004; Yik et al., 2003). The Cdk9 mutants S175A and S175D fail to bind Brd4 (Yang et al., 2005). D167N lacks kinase activity. The mutants 4A and 8A contain 4 and 8 Ser/Thr to Ala substitutions, respectively, in the Cdk9 C-terminal region and are unable to form the Tat-TAR-P-TEFb ternary complex (Fong and Zhou, 2000). **B.** The cyclin-box region in CycT1 is essential for the PIP7S-P-TEFb interaction. Factors associated with the indicated CycT1-f proteins were immunoprecipitated from transfected HeLa NEs (bottom panel) and analyzed as in A. The mutant  $\Delta$ N has a deletion of the cyclin-box in CycT1 (Chen et al., 2004). The mutant 2M contains two point mutations (K93L and E96K) in the cyclin-box region (Bieniasz et al., 1999).

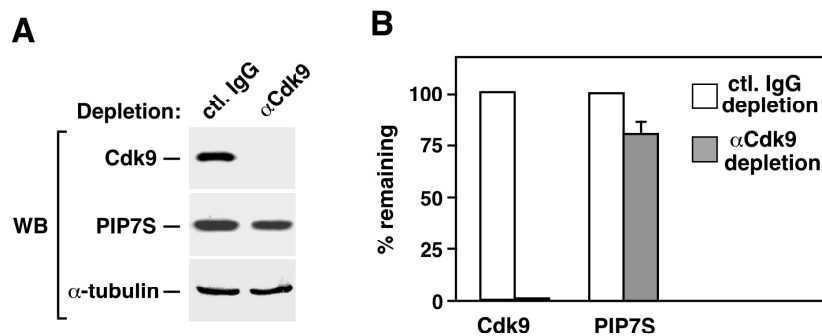

**Figure S2. P-TEFb interacts with about 20% PIP7S protein in vivo.** **A.** HeLa NEs were subjected to immunodepletion with the indicated antibodies and then analyzed by western blotting (WB). **B.** The levels of Cdk9 and PIP7S in the depleted NEs were normalized to those of  $\alpha$ -tubulin and quantified based on serial dilutions, with those in mock-depleted NE artificially set to 100%. The error bars represent mean  $\pm$  SD.

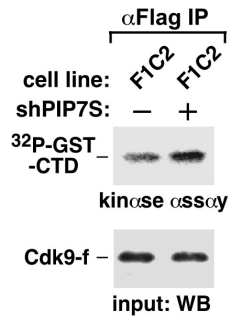

**Figure S3. PIP7S knockdown increases P-TEFb's kinase activity toward GST-CTD.** P-TEFb was affinity-purified by anti-Flag immunoprecipitation (IP) from NEs of F1C2 cells either expressing (+) or not expressing (-) shPIP7S, normalized for their Cdk9-f levels by western blotting (WB; lower panel), and analyzed in kinase reactions containing GST-CTD as a substrate (autoradiography; upper panel).

#### References for supplemental data:

- Bieniasz, P. D., Grdina, T. A., Bogerd, H. P., and Cullen, B. R. (1999). Recruitment of cyclin T1/P-TEFb to an HIV type 1 long terminal repeat promoter proximal RNA target is both necessary and sufficient for full activation of transcription. *Proc Natl Acad Sci U S A* *96*, 7791-7796.
- Chen, R., Yang, Z., and Zhou, Q. (2004). Phosphorylated positive transcription elongation factor b (P-TEFb) is tagged for inhibition through association with 7SK snRNA. *J Biol Chem* *279*, 4153-4160.
- Fong, Y. W., and Zhou, Q. (2000). Relief of two built-in autoinhibitory mechanisms in P-TEFb is required for assembly of a multicomponent transcription elongation complex at the human immunodeficiency virus type 1 promoter. *Mol Cell Biol* *20*, 5897-5907.

Yang, Z., Yik, J. H., Chen, R., He, N., Jang, M. K., Ozato, K., and Zhou, Q. (2005). Recruitment of P-TEFb for stimulation of transcriptional elongation by the bromodomain protein Brd4. *Mol Cell* *19*, 535-545.

Yik, J. H., Chen, R., Nishimura, R., Jennings, J. L., Link, A. J., and Zhou, Q. (2003). Inhibition of P-TEFb (CDK9/Cyclin T) kinase and RNA polymerase II transcription by the coordinated actions of HEXIM1 and 7SK snRNA. *Mol Cell* *12*, 971-982.
